# Supplementary material for: EPR parameters of amino acid radicals in P. eryngii versatile peroxidase and its W164Y variant computed at the QM/MM level
Source: Royal Society of Chemistry journal article supplement (doi:10.1039/c0cp02151b), 2011-01-01
Supplement: c0cp02151b.pdf [file c0cp02151b.pdf]

# EPR Parameters of Amino Acid Radicals in *P. eryngii* Versatile Peroxidase and its W164Y variant computed at the QM/MM level

*Caterina Bernini,<sup>a</sup> Rebecca Pogni,<sup>a</sup> Francisco J. Ruiz-Dueñas,<sup>b</sup> Angel T. Martínez,<sup>b</sup>*

*Riccardo Basosi<sup>a</sup> and Adalgisa Sinicropi<sup>a,\*</sup>*

<sup>a</sup>*Department of Chemistry, University of Siena, 53100 Siena, Italy*

<sup>b</sup>*Centro de Investigaciones Biológicas, Consejo Superior de Investigaciones Científicas, 28040 Madrid, Spain*

## Supporting Information

### Contents

1. Computational Details
  - 1.1. Setup of the System
  - 1.2. Force Field
  - 1.3. QM/MM Method
2. Results
  - 2.1. EPR magnetic parameters

## 2.2. Optimized Structures

## 2.3. QM/MM Energies

## 3. References

### 1. Computational Details

#### 1.1 Setup of the System

Initial structures for VP (pdb code: 2BOQ) and its W164Y variant (pdb code: 2W23) were obtained from the Protein Data Bank (1.33 Å and 1.94 Å resolution, respectively). The results of PROPKA2.0<sup>1</sup> runs were used, in combination with visual inspection, to assign the protonation states of all titratable residues (aspartic acid, glutamic acid and histidine) at the experimental pH (pH = 4.5). We assigned D30, D318, E26, E36, E40, E83, E140, E191, E217, E225 to be protonated, H39, H47, H232 to be protonated at the ε nitrogen and H169, which is coordinated to iron, to be protonated at the δ nitrogen. Missing hydrogen atoms were added by the psfgen module of VMD, version 1.8.6.<sup>2</sup> The protonated systems, as described above, with crystallographic water molecules, were neutralized with sodium and chlorine ions (0.15 M ionic strength) and fully solvated in a rectangular box (69 x 80 x 76 Å<sup>3</sup> for VP and 75 x 65 x 73 Å<sup>3</sup> for W164Y) of TIP3P water molecules using the autoionize and solvate modules of VMD.<sup>2</sup> Solvent boxes were created with a layer of at least 10 Å of water molecules around each protein atom and included 33975 and 31575 water molecules for VP and W164Y, respectively.

#### 1.2 Force Field

All heme parameters were taken from the existing CHARMM27 library,<sup>3</sup> originally determined for a Fe<sup>2+</sup> containing heme group,<sup>4</sup> with the exception that the atomic charges were modified to account for the different charge distribution in the Fe<sup>3+</sup>-porphyrine complex.

Force Field atom types and charges for the heme used in the present work:

| Atom name | type | charge  |                 |     |    |                 |                |       |       |  |
|-----------|------|---------|-----------------|-----|----|-----------------|----------------|-------|-------|--|
| GROUP     |      |         |                 |     |    |                 |                |       |       |  |
| ATOM FE   | FE   | 1.68 !  | O2A             | O1A |    | O2D             | O1D            |       |       |  |
| ATOM NA   | NPH  | -0.76 ! | \\              | //  |    | \\              | //             |       |       |  |
| ATOM NB   | NPH  | -0.76 ! | CGA             |     |    | CGD             |                |       |       |  |
| ATOM NC   | NPH  | -0.76 ! |                 |     |    |                 |                |       |       |  |
| ATOM ND   | NPH  | -0.76 ! | HBA1--CBA--HBA2 | HA  |    | HBD1--CBD--HBD2 |                |       |       |  |
| ATOM C1A  | CPA  | 0.32 !  |                 |     |    |                 |                |       |       |  |
| ATOM C2A  | CPB  | -0.03 ! | HAA1--CAA--HAA2 | CHA |    | HAD1--CAD--HAD2 |                |       |       |  |
| ATOM C3A  | CPB  | -0.02 ! |                 | /   |    |                 |                |       |       |  |
| ATOM C4A  | CPA  | 0.32 !  | C2A---C1A       |     |    | C4D---C3D       |                |       |       |  |
| ATOM C1B  | CPA  | 0.32 !  |                 |     |    |                 |                |       |       |  |
| ATOM C2B  | CPB  | -0.02 ! | HMA1\           |     |    |                 |                | /HMD1 |       |  |
| ATOM C3B  | CPB  | -0.03 ! | HMA2-CMA--C3A   | NA  |    | ND              | C2D--CMD--HMD2 |       |       |  |
| ATOM C4B  | CPA  | 0.32 !  | HMA3/           | \   | /  | \               | /              | \     | /HMD3 |  |
| ATOM C1C  | CPA  | 0.32 !  |                 | C4A | \  | /               | C1D            |       |       |  |
| ATOM C2C  | CPB  | -0.03 ! | /               | \   | /  | \               | \              |       |       |  |
| ATOM C3C  | CPB  | -0.02 ! | HB--CHB         |     | FE |                 | CHD--HD        |       |       |  |
| ATOM C4C  | CPA  | 0.32 !  | \               | /   | \  | /               |                |       |       |  |
| ATOM C1D  | CPA  | 0.32 !  |                 | C1B | /  | \               | C4C            | HAC   |       |  |

```

ATOM C2D CPB -0.02 !HMB1\ / \ / \ / \ /
ATOM C3D CPB -0.03 !HMB2-CMB--C2B NB NC C3C--CAC
ATOM C4D CPA 0.32 !HMB3/ | | | | \ \ /HBC1
GROUP ! | | | | CBC
ATOM CHA CPM -0.10 ! C3B---C4B C1C---C2C \HBC2
ATOM HA HA 0.10 ! | \_CHC_/ |
GROUP ! CAB | CMC--HMC3
ATOM CHB CPM -0.10 ! // \ HC / |
ATOM HB HA 0.10 ! CBB HAB HMC1 HMC2
GROUP ! / \
ATOM CHC CPM -0.10 ! HBB1 HBB2
ATOM HC HA 0.10 !
GROUP
ATOM CHD CPM -0.10
ATOM HD HA 0.10
GROUP
ATOM CMA CT3 -0.27
ATOM HMA1 HA 0.09
ATOM HMA2 HA 0.09
ATOM HMA3 HA 0.09
GROUP
ATOM CAA CT2 -0.18
ATOM HAA1 HA 0.09
ATOM HAA2 HA 0.09
GROUP
ATOM CBA CT2 -0.28
ATOM HBA1 HA 0.09
ATOM HBA2 HA 0.09
ATOM CGA CC 0.62
ATOM O1A OC -0.76
ATOM O2A OC -0.76
GROUP
ATOM CMB CT3 -0.27
ATOM HMB1 HA 0.09
ATOM HMB2 HA 0.09
ATOM HMB3 HA 0.09
GROUP
ATOM CAB C -0.20
ATOM HAB HA 0.20
GROUP
ATOM CBB C -0.20
ATOM HBB1 HA 0.10
ATOM HBB2 HA 0.10
GROUP
ATOM CMC CT3 -0.27
ATOM HMC1 HA 0.09
ATOM HMC2 HA 0.09
ATOM HMC3 HA 0.09
GROUP
ATOM CAC C -0.20
ATOM HAC HA 0.20
GROUP
ATOM CBC C -0.20
ATOM HBC1 HA 0.10
ATOM HBC2 HA 0.10
GROUP
ATOM CMD CT3 -0.27
ATOM HMD1 HA 0.09
ATOM HMD2 HA 0.09
ATOM HMD3 HA 0.09
GROUP
ATOM CAD CT2 -0.18
ATOM HAD1 HA 0.09
    
```

|              |       |
|--------------|-------|
| ATOM HAD2 HA | 0.09  |
| GROUP        |       |
| ATOM CBD CT2 | -0.28 |
| ATOM HBD1 HA | 0.09  |
| ATOM HBD2 HA | 0.09  |
| ATOM CGD CC  | 0.62  |
| ATOM O1D OC  | -0.76 |
| ATOM O2D OC  | -0.76 |

### 1.3 QM/MM Method

All QM/MM calculations were performed with the MOLCAS 7.4 package,<sup>5</sup> coupled with a modified version of the MM package Tinker 4.2.<sup>6</sup>

An electronic embedding scheme was applied, using hydrogen link atoms (HLA) with a scaled-charge model to treat the QM/MM boundary region.<sup>7,8</sup>

The frontier is placed at the CO-C $\alpha$ H and NH-C $\alpha$ H bonds of V163 and L165, respectively, and at the C $\alpha$ -C $\beta$  bond of E243. The QM models **M1** and **M2** (see Scheme 1 of the main text) were employed in QM/MM calculations of VP and W164Y enzymes, respectively. Model **M1** (40 atoms) includes the tryptophan residue (W164) with the CO and NH bonds of V163 and L165, respectively, and the negatively charged glutamate residue (E243). Model **M2** (37 atoms) is comprised of the tyrosyl residue (Y164) with the CO and NH bonds of V163 and L165, respectively, and the glutamate residue (E243). In both cases the overall charge for the QM part is -1 for the non-radical species and 0 for the radical species.

To correctly describe the frontier the HLA may interact with all the MM point charges, but cannot be involved in other MM potentials. The charges of the frontier MM carbon atoms were set to 0 to ensure that the QM wavefunction is not overpolarized by the proximity of HLA atoms. This procedure is allowed by the small values of the original CHARMM27 point charges.

**Table S1.** Partial charges used for V163, L165 and E243 at the frontier region.

| Residue     | Charge     |            |         |        |        |         |
|-------------|------------|------------|---------|--------|--------|---------|
|             | C $\alpha$ | H $\alpha$ | N       | H      | C      | O       |
| <b>V163</b> | 0.0000     | 0.0000     | -0.3740 | 0.3740 | -      | -       |
| <b>L165</b> | 0.0000     | 0.0000     | -       | -      | 0.5100 | -0.5100 |
| <b>E243</b> | 0.0000     | 0.0000     | -0.4284 | 0.3388 | 0.5548 | -0.4652 |

Both subsystems (QM and MM) interact in the following way: (a) the QM wave function is polarized by all the MM point charges; (b) stretching, bending and torsion potentials involving at least one MM atom are described at the MM level; (c) standard van der Waals potentials are used to represent the interaction between atom pairs (QM/MM) separated by more than two bonds.

Therefore, the Hamiltonian used in the computations takes the following form:

$$\hat{H} = \hat{H}_{QM} + \hat{H}_{MM} + \sum_{i=1}^n \sum_{j=1}^Q -\frac{q_j}{r_{ij}} + \sum_{i=1}^N \sum_{j=1}^Q \frac{Z_i q_j}{r_{ij}} + E_{vdW} + E_{bonded}$$

where  $\hat{H}_{QM}$  is the Hamiltonian of the QM subsystem *in vacuo*.  $\hat{H}_{MM}$  is the Hamiltonian of the MM subsystem computed using the CHARMM27 forcefield, and the remaining four terms are the interacting QM/MM Hamiltonian. The first two terms comprise the electrostatic interactions (polarization of the wavefunction by the MM charges and Coulomb term between QM and MM nuclei) that were approximated using the ElectroStatic Potential Fitted method (ESPF) implemented in MOLCAS. The third term corresponds to the van der Waals interaction term computed using the definition of the CHARMM27 forcefield, and the last one contains the terms needed for a proper description of the frontier within the hydrogen link atom scheme. The active MM region has been defined to include all residues and solvent molecules that have atoms within a distance of 5 Å around any QM atoms and R257, K253 and S246 residues.

Here we explicitly specify the protein residues belonging to the chosen active region: P159, V160, E161, V162, V163, W164/Y164, L165, L166, A167, S168, F193, F198, Q239, T240, A241, E243, Q245, S246, M247, V248, N250, Q251, P252, K253, I254, Q255, N256, R257, F258, A259, A260, T261, M262.

## 2. Results

### 2.1 EPR magnetic parameters

The theoretical framework for present day EPR calculations is provided by hybrid DFT methods,<sup>9-17</sup> that give better results than those delivered by the “pure” functionals or by competing theories based on correlated *ab initio* methods.<sup>18</sup> Among hybrid functionals, B3LYP<sup>19-21</sup> gives good theoretical results for EPR spectroscopy. Viable alternatives are PBE0<sup>9</sup> and TPSSh.<sup>22</sup> For the calculations of EPR properties a predefined special basis set can be used, such as the polarized triple- $\zeta$  valence basis set TZVP or the Barone’s<sup>23, 24</sup> EPR-II basis set. The spectroscopic data were obtained from additional single-point calculations at all sets of optimized structures using several hybrid density functionals (B3LYP, PBE0, TPSSh) in combination with the TZVP and EPR-II spectroscopic basis set for all atoms (see Table S2-16). These calculations were performed with the program package ORCA.<sup>25</sup> For B3LYP/TZVP computed values and abbreviations see the main paper.

**Table S2.** g-tensors, hfcc (mT) and Mulliken spin densities computed for **VP\_10ns-neu** structure.

|                            |            | B3LYP/EPR-II | PBE0/EPR-II | PBE0/TZVP | TPSSH/EPR-II | TPSSH/TZVP |
|----------------------------|------------|--------------|-------------|-----------|--------------|------------|
| <b>g-tensors</b>           |            |              |             |           |              |            |
| <b>g<sub>i</sub></b>       | <b>iso</b> | 2.00280      | 2.00279     | 2.00285   | 2.00277      | 2.00283    |
|                            | <b>x</b>   | 2.00341      | 2.00341     | 2.00350   | 2.00333      | 2.00343    |
|                            | <b>y</b>   | 2.00268      | 2.00266     | 2.00274   | 2.00266      | 2.00274    |
|                            | <b>z</b>   | 2.00231      | 2.00230     | 2.00232   | 2.00232      | 2.00233    |
| <b>hfcc</b>                |            |              |             |           |              |            |
| <b>A<sub>i</sub>(H-β1)</b> | <b>iso</b> | 2.77         | 2.72        | 2.58      | 2.85         | 2.71       |
|                            | <b>x</b>   | 2.65         | 2.60        | 2.45      | 2.74         | 2.60       |
|                            | <b>y</b>   | 2.95         | 2.90        | 2.76      | 3.03         | 2.90       |
|                            | <b>z</b>   | 2.71         | 2.66        | 2.51      | 2.79         | 2.65       |
| <b>A<sub>i</sub>(H-β2)</b> | <b>iso</b> | 1.07         | 1.06        | 1.01      | 1.09         | 1.05       |
|                            | <b>x</b>   | 1.02         | 1.00        | 0.95      | 1.03         | 0.93       |
|                            | <b>y</b>   | 0.96         | 0.94        | 0.90      | 0.97         | 0.98       |
|                            | <b>z</b>   | 1.24         | 1.23        | 1.19      | 1.26         | 1.22       |
| <b>A<sub>i</sub>(H1)</b>   | <b>iso</b> | -0.08        | -0.06       | -0.06     | -0.08        | -0.06      |
|                            | <b>x</b>   | -0.23        | -0.22       | -0.22     | -0.23        | -0.21      |
|                            | <b>y</b>   | 0.19         | 0.20        | 0.20      | 0.18         | 0.20       |
|                            | <b>z</b>   | -0.19        | -0.17       | -0.17     | -0.18        | -0.16      |
| <b>A<sub>i</sub>(H2)</b>   | <b>iso</b> | -0.20        | -0.19       | -0.19     | -0.24        | -0.23      |
|                            | <b>x</b>   | -0.35        | -0.34       | -0.33     | -0.38        | -0.37      |
|                            | <b>y</b>   | 0.06         | 0.07        | 0.07      | 0.02         | 0.03       |
|                            | <b>z</b>   | -0.32        | -0.31       | -0.30     | -0.36        | -0.34      |
| <b>A<sub>i</sub>(H-5)</b>  | <b>iso</b> | -0.53        | -0.51       | -0.58     | -0.58        | -0.59      |
|                            | <b>x</b>   | -0.78        | -0.75       | -0.82     | -0.83        | -0.83      |
|                            | <b>y</b>   | -0.23        | -0.22       | -0.28     | -0.27        | -0.29      |
|                            | <b>z</b>   | -0.59        | -0.57       | -0.62     | -0.64        | -0.64      |
| <b>A<sub>i</sub>(H-7)</b>  | <b>iso</b> | -0.44        | -0.42       | -0.47     | -0.47        | -0.47      |
|                            | <b>x</b>   | -0.15        | -0.14       | -0.19     | -0.18        | -0.19      |
|                            | <b>y</b>   | -0.69        | -0.66       | -0.73     | -0.73        | -0.72      |
|                            | <b>z</b>   | -0.47        | -0.45       | -0.50     | -0.51        | -0.51      |
| <b>A<sub>i</sub>(N1)</b>   | <b>iso</b> | 0.26         | 0.23        | 0.23      | 0.20         | 0.17       |
|                            | <b>x</b>   | -0.04        | -0.08       | -0.08     | -0.10        | -0.14      |
|                            | <b>y</b>   | -0.06        | -0.09       | -0.10     | -0.12        | -0.16      |
|                            | <b>z</b>   | 0.89         | 0.88        | 0.87      | 0.83         | 0.80       |
| <b>spin densities</b>      |            |              |             |           |              |            |
| <b>N1</b>                  |            | 0.19         | 0.19        | 0.20      | 0.19         | 0.19       |
| <b>C2</b>                  |            | 0.03         | 0.01        | -0.01     | 0.02         | -0.02      |
| <b>C3</b>                  |            | 0.49         | 0.56        | 0.61      | 0.52         | 0.60       |
| <b>C5</b>                  |            | 0.22         | 0.26        | 0.28      | 0.23         | 0.27       |
| <b>C6</b>                  |            | -0.07        | -0.09       | -0.12     | -0.08        | -0.11      |
| <b>C7</b>                  |            | 0.17         | 0.19        | 0.20      | 0.18         | 0.19       |
| <b>C8</b>                  |            | 0.02         | 0.01        | 0.01      | 0.02         | 0.03       |

**Table S3.** g-tensors, hfcc (mT) and Mulliken spin densities computed for **VP\_9.8ns-neu** structure.

|                            |            | B3LYP/EPR-II | PBE0/EPR-II | PBE0/TZVP | TPSSH/EPR-II | TPSSH/TZVP |
|----------------------------|------------|--------------|-------------|-----------|--------------|------------|
| <b>g-tensors</b>           |            |              |             |           |              |            |
| <b>g<sub>i</sub></b>       | <b>iso</b> | 2.00280      | 2.00279     | 2.00285   | 2.00277      | 2.00283    |
|                            | <b>x</b>   | 2.00342      | 2.00342     | 2.00351   | 2.00333      | 2.00344    |
|                            | <b>y</b>   | 2.00268      | 2.00265     | 2.00273   | 2.00266      | 2.00273    |
|                            | <b>z</b>   | 2.00231      | 2.00230     | 2.00231   | 2.00232      | 2.00233    |
| <b>hfcc</b>                |            |              |             |           |              |            |
| <b>A<sub>i</sub>(H-β1)</b> | <b>iso</b> | 2.77         | 2.72        | 2.58      | 2.85         | 2.71       |
|                            | <b>x</b>   | 2.65         | 2.66        | 2.45      | 2.74         | 2.60       |
|                            | <b>y</b>   | 2.95         | 2.90        | 2.77      | 3.03         | 2.90       |
|                            | <b>z</b>   | 2.71         | 2.60        | 2.52      | 2.79         | 2.65       |
| <b>A<sub>i</sub>(H-β2)</b> | <b>iso</b> | 1.01         | 1.00        | 0.96      | 1.02         | 0.98       |
|                            | <b>x</b>   | 0.96         | 0.94        | 0.89      | 0.97         | 0.92       |
|                            | <b>y</b>   | 0.90         | 0.88        | 0.84      | 0.91         | 0.87       |
|                            | <b>z</b>   | 1.18         | 1.17        | 1.13      | 1.19         | 1.16       |
| <b>A<sub>i</sub>(H1)</b>   | <b>iso</b> | -0.06        | -0.06       | -0.05     | -0.06        | -0.04      |
|                            | <b>x</b>   | -0.21        | -0.20       | -0.19     | -0.20        | -0.18      |
|                            | <b>y</b>   | 0.19         | 0.19        | 0.20      | 0.17         | 0.19       |
|                            | <b>z</b>   | -0.17        | -0.16       | -0.15     | -0.17        | -0.14      |
| <b>A<sub>i</sub>(H2)</b>   | <b>iso</b> | -0.21        | -0.21       | -0.20     | -0.25        | -0.23      |
|                            | <b>x</b>   | -0.35        | -0.36       | -0.34     | -0.39        | -0.38      |
|                            | <b>y</b>   | 0.06         | 0.06        | 0.07      | 0.01         | 0.03       |
|                            | <b>z</b>   | -0.32        | -0.32       | -0.31     | -0.36        | -0.35      |
| <b>A<sub>i</sub>(H-5)</b>  | <b>iso</b> | -0.53        | -0.58       | -0.57     | -0.57        | -0.58      |
|                            | <b>x</b>   | -0.76        | -0.82       | -0.81     | -0.82        | -0.82      |
|                            | <b>y</b>   | -0.23        | -0.28       | -0.28     | -0.27        | -0.29      |
|                            | <b>z</b>   | -0.58        | -0.63       | -0.61     | -0.63        | -0.63      |
| <b>A<sub>i</sub>(H-7)</b>  | <b>iso</b> | -0.44        | -0.49       | -0.48     | -0.48        | -0.48      |
|                            | <b>x</b>   | -0.15        | -0.19       | -0.19     | -0.18        | -0.19      |
|                            | <b>y</b>   | -0.70        | -0.76       | -0.74     | -0.74        | -0.74      |
|                            | <b>z</b>   | -0.48        | -0.52       | -0.50     | -0.52        | -0.51      |
| <b>A<sub>i</sub>(N1)</b>   | <b>iso</b> | 0.27         | 0.26        | 0.23      | 0.21         | 0.17       |
|                            | <b>x</b>   | -0.04        | -0.05       | -0.08     | -0.10        | -0.14      |
|                            | <b>y</b>   | -0.05        | -0.06       | -0.10     | -0.11        | -0.15      |
|                            | <b>z</b>   | 0.90         | 0.89        | 0.87      | 0.83         | 0.81       |
| <b>spin densities</b>      |            |              |             |           |              |            |
| <b>N1</b>                  |            | 0.19         | 0.19        | 0.20      | 0.19         | 0.19       |
| <b>C2</b>                  |            | 0.03         | 0.02        | -0.01     | 0.02         | -0.01      |
| <b>C3</b>                  |            | 0.49         | 0.53        | 0.61      | 0.52         | 0.60       |
| <b>C5</b>                  |            | 0.21         | 0.23        | 0.28      | 0.23         | 0.27       |
| <b>C6</b>                  |            | -0.07        | -0.09       | -0.12     | -0.08        | -0.11      |
| <b>C7</b>                  |            | 0.17         | 0.19        | 0.21      | 0.18         | 0.20       |
| <b>C8</b>                  |            | 0.02         | 0.01        | 0.01      | 0.02         | 0.02       |



**Table S4.** g-tensors, hfcc (mT) and Mulliken spin densities computed for **VP\_9.6ns-neu** structure.

|                            |            | B3LYP/EPR-II | PBE0/EPR-II | PBE0/TZVP | TPSSH/EPR-II | TPSSH/TZVP |
|----------------------------|------------|--------------|-------------|-----------|--------------|------------|
| <b>g-tensors</b>           |            |              |             |           |              |            |
| <b>g<sub>i</sub></b>       | <b>iso</b> | 2.00279      | 2.00278     | 2.00285   | 2.00277      | 2.00284    |
|                            | <b>x</b>   | 2.00341      | 2.00340     | 2.00352   | 2.00333      | 2.00346    |
|                            | <b>y</b>   | 2.00266      | 2.00263     | 2.00272   | 2.00265      | 2.00273    |
|                            | <b>z</b>   | 2.00231      | 2.00230     | 2.00231   | 2.00233      | 2.00233    |
| <b>hfcc</b>                |            |              |             |           |              |            |
| <b>A<sub>i</sub>(H-β1)</b> | <b>iso</b> | 2.79         | 2.73        | 2.59      | 2.86         | 2.73       |
|                            | <b>x</b>   | 2.67         | 2.61        | 2.47      | 2.75         | 2.61       |
|                            | <b>y</b>   | 2.97         | 2.91        | 2.78      | 3.04         | 2.91       |
|                            | <b>z</b>   | 2.73         | 2.67        | 2.53      | 2.80         | 2.66       |
|                            |            |              |             |           |              |            |
| <b>A<sub>i</sub>(H-β2)</b> | <b>iso</b> | 0.96         | 0.95        | 0.91      | 0.97         | 0.93       |
|                            | <b>x</b>   | 0.91         | 0.90        | 0.85      | 0.92         | 0.87       |
|                            | <b>y</b>   | 0.85         | 0.84        | 0.80      | 0.86         | 0.82       |
|                            | <b>z</b>   | 1.13         | 1.12        | 1.08      | 1.14         | 1.10       |
|                            |            |              |             |           |              |            |
| <b>A<sub>i</sub>(H1)</b>   | <b>iso</b> | -0.09        | -0.09       | -0.07     | -0.09        | -0.07      |
|                            | <b>x</b>   | -0.25        | -0.24       | -0.23     | -0.24        | -0.22      |
|                            | <b>y</b>   | 0.17         | 0.17        | 0.18      | 0.15         | 0.18       |
|                            | <b>z</b>   | -0.20        | -0.19       | -0.17     | -0.19        | -0.17      |
|                            |            |              |             |           |              |            |
| <b>A<sub>i</sub>(H2)</b>   | <b>iso</b> | -0.23        | -0.24       | -0.23     | -0.27        | -0.26      |
|                            | <b>x</b>   | -0.40        | -0.40       | -0.39     | -0.43        | -0.42      |
|                            | <b>y</b>   | 0.05         | 0.04        | 0.05      | 0.01         | 0.01       |
|                            | <b>z</b>   | -0.35        | -0.35       | -0.34     | -0.39        | -0.38      |
|                            |            |              |             |           |              |            |
| <b>A<sub>i</sub>(H-5)</b>  | <b>iso</b> | -0.53        | -0.58       | -0.57     | -0.58        | -0.59      |
|                            | <b>x</b>   | -0.77        | -0.83       | -0.82     | -0.83        | -0.83      |
|                            | <b>y</b>   | -0.23        | -0.28       | -0.28     | -0.27        | -0.29      |
|                            | <b>z</b>   | -0.59        | -0.63       | -0.62     | -0.64        | -0.64      |
|                            |            |              |             |           |              |            |
| <b>A<sub>i</sub>(H-7)</b>  | <b>iso</b> | -0.43        | -0.48       | -0.46     | -0.46        | -0.46      |
|                            | <b>x</b>   | -0.15        | -0.19       | -0.18     | -0.17        | -0.18      |
|                            | <b>y</b>   | -0.68        | -0.74       | -0.72     | -0.72        | -0.71      |
|                            | <b>z</b>   | -0.46        | -0.51       | -0.49     | -0.50        | -0.50      |
|                            |            |              |             |           |              |            |
| <b>A<sub>i</sub>(N1)</b>   | <b>iso</b> | 0.26         | 0.25        | 0.23      | 0.20         | 0.17       |
|                            | <b>x</b>   | -0.04        | -0.05       | -0.08     | -0.10        | -0.13      |
|                            | <b>y</b>   | -0.05        | -0.06       | -0.09     | -0.11        | -0.15      |
|                            | <b>z</b>   | 0.88         | 0.87        | 0.85      | 0.81         | 0.79       |
| <b>spin densities</b>      |            |              |             |           |              |            |
| <b>N1</b>                  |            | 0.19         | 0.19        | 0.19      | 0.18         | 0.19       |
| <b>C2</b>                  |            | 0.04         | 0.03        | 0.01      | 0.03         | 0.00       |
| <b>C3</b>                  |            | 0.49         | 0.52        | 0.60      | 0.51         | 0.59       |
| <b>C5</b>                  |            | 0.21         | 0.23        | 0.28      | 0.23         | 0.27       |
| <b>C6</b>                  |            | -0.07        | -0.09       | -0.12     | -0.08        | -0.10      |
| <b>C7</b>                  |            | 0.17         | 0.18        | 0.20      | 0.18         | 0.19       |
| <b>C8</b>                  |            | 0.02         | 0.01        | 0.01      | 0.02         | 0.03       |

**Table S5.** g-tensors, hfcc (mT) and Mulliken spin densities computed for **VP\_9.4ns-neu** structure.

|                            |            | B3LYP/EPR-II | PBE0/EPR-II | PBE0/TZVP | TPSSH/EPR-II | TPSSH/TZVP |
|----------------------------|------------|--------------|-------------|-----------|--------------|------------|
| <b>g-tensors</b>           |            |              |             |           |              |            |
| <b>g<sub>i</sub></b>       | <b>iso</b> | 2.00280      | 2.00279     | 2.00285   | 2.00276      | 2.00282    |
|                            | <b>x</b>   | 2.00342      | 2.00342     | 2.00350   | 2.00332      | 2.00342    |
|                            | <b>y</b>   | 2.00268      | 2.00266     | 2.00274   | 2.00266      | 2.00273    |
|                            | <b>z</b>   | 2.00231      | 2.00230     | 2.00232   | 2.00231      | 2.00233    |
| <b>hfcc</b>                |            |              |             |           |              |            |
| <b>A<sub>i</sub>(H-β1)</b> | <b>iso</b> | 2.78         | 2.73        | 2.59      | 2.87         | 2.73       |
|                            | <b>x</b>   | 2.66         | 2.61        | 2.46      | 2.76         | 2.61       |
|                            | <b>y</b>   | 2.96         | 2.91        | 2.78      | 3.05         | 2.92       |
|                            | <b>z</b>   | 2.72         | 2.67        | 2.53      | 2.81         | 2.67       |
| <b>A<sub>i</sub>(H-β2)</b> | <b>iso</b> | 1.03         | 1.01        | 0.97      | 1.04         | 1.00       |
|                            | <b>x</b>   | 0.97         | 0.96        | 0.91      | 0.99         | 0.94       |
|                            | <b>y</b>   | 0.92         | 0.90        | 0.86      | 0.93         | 0.89       |
|                            | <b>z</b>   | 1.20         | 1.18        | 1.15      | 1.21         | 1.17       |
| <b>A<sub>i</sub>(H1)</b>   | <b>iso</b> | -0.06        | -0.06       | -0.05     | -0.06        | -0.04      |
|                            | <b>x</b>   | -0.20        | -0.20       | -0.19     | -0.20        | -0.18      |
|                            | <b>y</b>   | 0.18         | 0.19        | 0.20      | 0.17         | 0.19       |
|                            | <b>z</b>   | -0.16        | -0.16       | -0.15     | -0.16        | -0.14      |
| <b>A<sub>i</sub>(H2)</b>   | <b>iso</b> | -0.18        | -0.18       | -0.17     | -0.22        | -0.21      |
|                            | <b>x</b>   | -0.32        | -0.32       | -0.31     | -0.36        | -0.34      |
|                            | <b>y</b>   | 0.07         | 0.07        | 0.08      | 0.03         | 0.04       |
|                            | <b>z</b>   | -0.30        | -0.30       | -0.29     | -0.34        | -0.33      |
| <b>A<sub>i</sub>(H-5)</b>  | <b>iso</b> | -0.53        | -0.58       | -0.57     | -0.58        | -0.59      |
|                            | <b>x</b>   | -0.78        | -0.84       | -0.82     | -0.84        | -0.84      |
|                            | <b>y</b>   | -0.23        | -0.28       | -0.28     | -0.27        | -0.29      |
|                            | <b>z</b>   | -0.59        | -0.64       | -0.62     | -0.64        | -0.64      |
| <b>A<sub>i</sub>(H-7)</b>  | <b>iso</b> | -0.44        | -0.48       | -0.47     | -0.47        | -0.47      |
|                            | <b>x</b>   | -0.15        | -0.19       | -0.19     | -0.18        | -0.19      |
|                            | <b>y</b>   | -0.68        | -0.74       | -0.73     | -0.73        | -0.73      |
|                            | <b>z</b>   | -0.47        | -0.51       | -0.50     | -0.51        | -0.51      |
| <b>A<sub>i</sub>(N1)</b>   | <b>iso</b> | 0.28         | 0.27        | 0.24      | 0.21         | 0.18       |
|                            | <b>x</b>   | -0.04        | -0.05       | -0.10     | -0.10        | -0.14      |
|                            | <b>y</b>   | -0.05        | -0.06       | -0.08     | -0.11        | -0.16      |
|                            | <b>z</b>   | 0.92         | 0.92        | 0.90      | 0.86         | 0.83       |
| <b>spin densities</b>      |            |              |             |           |              |            |
| <b>N1</b>                  |            | 0.20         | 0.20        | 0.20      | 0.20         | 0.20       |
| <b>C2</b>                  |            | 0.02         | 0.01        | -0.02     | 0.01         | -0.03      |
| <b>C3</b>                  |            | 0.50         | 0.53        | 0.61      | 0.52         | 0.60       |
| <b>C5</b>                  |            | 0.22         | 0.23        | 0.28      | 0.23         | 0.27       |
| <b>C6</b>                  |            | -0.07        | -0.09       | -0.12     | -0.08        | -0.10      |
| <b>C7</b>                  |            | 0.17         | 0.18        | 0.20      | 0.18         | 0.19       |
| <b>C8</b>                  |            | 0.02         | 0.01        | 0.01      | 0.02         | 0.03       |

**Table S6.** g-tensors, hfcc (mT) and Mulliken spin densities computed for **VP\_9.2ns-neu** structure.

|                            |            | B3LYP/EPR-II | PBE0/EPR-II | PBE0/TZVP | TPSSH/EPR-II | TPSSH/TZVP |
|----------------------------|------------|--------------|-------------|-----------|--------------|------------|
| <b>g-tensors</b>           |            |              |             |           |              |            |
| <b>g<sub>i</sub></b>       | <b>iso</b> | 2.00280      | 2.00279     | 2.00285   | 2.00277      | 2.00283    |
|                            | <b>x</b>   | 2.00342      | 2.00341     | 2.00349   | 2.00334      | 2.00344    |
|                            | <b>y</b>   | 2.00267      | 2.00264     | 2.00272   | 2.00265      | 2.00272    |
|                            | <b>z</b>   | 2.00231      | 2.00230     | 2.00232   | 2.00233      | 2.00234    |
| <b>hfcc</b>                |            |              |             |           |              |            |
| <b>A<sub>i</sub>(H-β1)</b> | <b>iso</b> | 2.84         | 2.78        | 2.64      | 2.92         | 2.78       |
|                            | <b>x</b>   | 2.72         | 2.66        | 2.51      | 2.81         | 2.66       |
|                            | <b>y</b>   | 3.02         | 2.97        | 2.83      | 3.10         | 2.96       |
|                            | <b>z</b>   | 2.78         | 2.73        | 2.58      | 2.86         | 2.71       |
| <b>A<sub>i</sub>(H-β2)</b> | <b>iso</b> | 0.99         | 0.98        | 0.94      | 1.00         | 0.96       |
|                            | <b>x</b>   | 0.94         | 0.92        | 0.88      | 0.95         | 0.90       |
|                            | <b>y</b>   | 0.88         | 0.87        | 0.83      | 0.89         | 0.85       |
|                            | <b>z</b>   | 1.16         | 1.15        | 1.12      | 1.17         | 1.14       |
| <b>A<sub>i</sub>(H1)</b>   | <b>iso</b> | -0.07        | -0.07       | -0.06     | -0.07        | -0.05      |
|                            | <b>x</b>   | -0.22        | -0.22       | -0.21     | -0.22        | -0.20      |
|                            | <b>y</b>   | 0.18         | 0.18        | 0.20      | 0.17         | 0.19       |
|                            | <b>z</b>   | -0.18        | -0.17       | -0.16     | -0.18        | -0.15      |
| <b>A<sub>i</sub>(H2)</b>   | <b>iso</b> | -0.22        | -0.22       | -0.21     | -0.26        | -0.25      |
|                            | <b>x</b>   | -0.37        | -0.37       | -0.36     | -0.41        | -0.40      |
|                            | <b>y</b>   | 0.06         | 0.05        | 0.06      | 0.01         | 0.02       |
|                            | <b>z</b>   | -0.33        | -0.33       | -0.32     | -0.38        | -0.36      |
| <b>A<sub>i</sub>(H-5)</b>  | <b>iso</b> | -0.53        | -0.58       | -0.57     | -0.57        | -0.58      |
|                            | <b>x</b>   | -0.76        | -0.83       | -0.81     | -0.82        | -0.82      |
|                            | <b>y</b>   | -0.23        | -0.28       | -0.28     | -0.27        | -0.28      |
|                            | <b>z</b>   | -0.58        | -0.63       | -0.61     | -0.63        | -0.63      |
| <b>A<sub>i</sub>(H-7)</b>  | <b>iso</b> | -0.45        | -0.50       | -0.48     | -0.48        | -0.49      |
|                            | <b>x</b>   | -0.15        | -0.19       | -0.19     | -0.18        | -0.19      |
|                            | <b>y</b>   | -0.70        | -0.77       | -0.75     | -0.75        | -0.74      |
|                            | <b>z</b>   | -0.48        | -0.52       | -0.51     | -0.52        | -0.52      |
| <b>A<sub>i</sub>(N1)</b>   | <b>iso</b> | 0.26         | 0.25        | 0.22      | 0.20         | 0.16       |
|                            | <b>x</b>   | -0.04        | -0.05       | -0.08     | -0.10        | -0.14      |
|                            | <b>y</b>   | -0.06        | -0.07       | -0.10     | -0.12        | 0.16       |
|                            | <b>z</b>   | 0.87         | 0.87        | 0.85      | 0.81         | 0.79       |
| <b>spin densities</b>      |            |              |             |           |              |            |
| <b>N1</b>                  |            | 0.19         | 0.19        | 0.19      | 0.19         | 0.19       |
| <b>C2</b>                  |            | 0.03         | 0.02        | 0.01      | 0.02         | -0.01      |
| <b>C3</b>                  |            | 0.49         | 0.53        | 0.60      | 0.52         | 0.59       |
| <b>C5</b>                  |            | 0.21         | 0.23        | 0.28      | 0.23         | 0.27       |
| <b>C6</b>                  |            | -0.07        | -0.09       | -0.12     | -0.08        | -0.11      |
| <b>C7</b>                  |            | 0.18         | 0.19        | 0.21      | 0.18         | 0.20       |
| <b>C8</b>                  |            | 0.01         | -0.01       | -0.01     | 0.01         | 0.02       |

**Table S7.** g-tensors, hfcc (mT) and Mulliken spin densities computed for **VP\_10ns-cat** structure.

|                            |            | B3LYP/EPR-II | PBE0/EPR-II | PBE0/TZVP | TPSSh/EPR-II | TPSSh/TZVP |
|----------------------------|------------|--------------|-------------|-----------|--------------|------------|
| <b>g-tensors</b>           |            |              |             |           |              |            |
| <b>g<sub>i</sub></b>       | <b>iso</b> | 2.00278      | 2.00275     | 2.00283   | 2.00283      | 2.00290    |
|                            | <b>x</b>   | 2.00339      | 2.00337     | 2.00346   | 2.00338      | 2.00350    |
|                            | <b>y</b>   | 2.00261      | 2.00256     | 2.00269   | 2.00271      | 2.00279    |
|                            | <b>z</b>   | 2.00235      | 2.00233     | 2.00235   | 2.00239      | 2.00241    |
| <b>hfcc</b>                |            |              |             |           |              |            |
| <b>A<sub>i</sub>(H-β1)</b> | <b>iso</b> | 2.49         | 2.45        | 2.32      | 2.54         | 2.42       |
|                            | <b>x</b>   | 2.38         | 2.34        | 2.21      | 2.44         | 2.32       |
|                            | <b>y</b>   | 2.65         | 2.62        | 2.50      | 2.70         | 2.59       |
|                            | <b>z</b>   | 2.43         | 2.39        | 2.27      | 2.48         | 2.36       |
| <b>A<sub>i</sub>(H-β2)</b> | <b>iso</b> | 0.94         | 0.93        | 0.89      | 0.94         | 0.91       |
|                            | <b>x</b>   | 0.89         | 0.99        | 0.84      | 0.90         | 0.86       |
|                            | <b>y</b>   | 0.83         | 0.82        | 0.79      | 0.83         | 0.80       |
|                            | <b>z</b>   | 1.09         | 1.08        | 1.05      | 1.09         | 1.06       |
| <b>A<sub>i</sub>(H1)</b>   | <b>iso</b> | -0.38        | -0.37       | -0.36     | -0.36        | -0.34      |
|                            | <b>x</b>   | -0.67        | -0.67       | -0.66     | -0.65        | -0.63      |
|                            | <b>y</b>   | 0.06         | 0.06        | 0.07      | 0.06         | 0.07       |
|                            | <b>z</b>   | -0.51        | -0.50       | -0.49     | -0.49        | -0.47      |
| <b>A<sub>i</sub>(H2)</b>   | <b>iso</b> | -0.35        | -0.38       | -0.36     | -0.39        | -0.38      |
|                            | <b>x</b>   | -0.46        | -0.48       | -0.46     | -0.50        | -0.48      |
|                            | <b>y</b>   | -0.01        | -0.03       | -0.02     | -0.06        | -0.05      |
|                            | <b>z</b>   | -0.58        | -0.61       | -0.59     | -0.61        | -0.59      |
| <b>A<sub>i</sub>(H-5)</b>  | <b>iso</b> | -0.57        | -0.62       | -0.62     | -0.62        | -0.63      |
|                            | <b>x</b>   | -0.84        | -0.91       | -0.89     | -0.90        | -0.90      |
|                            | <b>y</b>   | -0.24        | -0.29       | -0.29     | -0.28        | -0.30      |
|                            | <b>z</b>   | -0.63        | -0.68       | -0.66     | -0.68        | -0.68      |
| <b>A<sub>i</sub>(H-7)</b>  | <b>iso</b> | -0.46        | -0.51       | -0.49     | -0.49        | -0.49      |
|                            | <b>x</b>   | -0.15        | -0.20       | -0.19     | -0.18        | -0.19      |
|                            | <b>y</b>   | -0.72        | -0.78       | -0.76     | -0.76        | -0.75      |
|                            | <b>z</b>   | -0.50        | -0.54       | -0.52     | -0.53        | -0.53      |
| <b>A<sub>i</sub>(N1)</b>   | <b>iso</b> | 0.21         | 0.20        | 0.18      | 0.17         | 0.14       |
|                            | <b>x</b>   | -0.05        | -0.06       | -0.08     | -0.09        | -0.13      |
|                            | <b>y</b>   | -0.07        | -0.07       | -0.10     | -0.11        | -0.14      |
|                            | <b>z</b>   | 0.75         | 0.74        | 0.73      | 0.70         | 0.68       |
| <b>spin densities</b>      |            |              |             |           |              |            |
| <b>N1</b>                  |            | 0.16         | 0.15        | 0.15      | 0.15         | 0.15       |
| <b>C2</b>                  |            | 0.10         | 0.10        | 0.08      | 0.09         | 0.06       |
| <b>C3</b>                  |            | 0.42         | 0.46        | 0.53      | 0.45         | 0.52       |
| <b>C5</b>                  |            | 0.23         | 0.25        | 0.29      | 0.24         | 0.29       |
| <b>C6</b>                  |            | -0.08        | -0.10       | -0.12     | -0.09        | -0.11      |
| <b>C7</b>                  |            | 0.18         | 0.19        | 0.21      | 0.19         | 0.20       |
| <b>C8</b>                  |            | 0.04         | 0.03        | 0.04      | 0.05         | 0.06       |

Computed EPR parameters of tryptophan radicals were found almost independent of the choice of hybrid functional (B3LYP, PBE0 or TPSSh) and basis set (TZVP or EPR-II). Indeed, g-tensors and hfcc values computed for the same structure, using the six different combinations of functional and basis set displayed, vary within a maximum of 200 ppm and 0.2 mT, respectively.

**Table S8.** B3LYP/TZVP g-tensors, hfcc (mT) and Mulliken spin densities computed for **VP\_10ns-TS**.

|                   |     | g-tensors | hfcc                    |                         |                  |                  |                  |                  |                  | spin densities |      |      |      |       |      |      |
|-------------------|-----|-----------|-------------------------|-------------------------|------------------|------------------|------------------|------------------|------------------|----------------|------|------|------|-------|------|------|
|                   |     | $g_i$     | $A_i(\text{H-}\beta 1)$ | $A_i(\text{H-}\beta 2)$ | $A_i(\text{H1})$ | $A_i(\text{H2})$ | $A_i(\text{H5})$ | $A_i(\text{H7})$ | $A_i(\text{N1})$ | N1             | C2   | C3   | C5   | C6    | C7   | C8   |
| <b>VP_10ns-TS</b> | iso | 2.00285   | 2.47                    | 0.93                    | -0.25            | -0.30            | -0.54            | -0.44            | 0.20             | 0.16           | 0.06 | 0.51 | 0.27 | -0.10 | 0.20 | 0.04 |
|                   | x   | 2.00348   | 2.35                    | 0.87                    | -0.48            | -0.41            | -0.80            | -0.15            | -0.07            |                |      |      |      |       |      |      |
|                   | y   | 2.00273   | 2.65                    | 0.82                    | 0.12             | 0.01             | -0.23            | -0.71            | -0.09            |                |      |      |      |       |      |      |
|                   | z   | 2.00234   | 2.41                    | 1.09                    | -0.38            | -0.50            | -0.59            | -0.48            | 0.77             |                |      |      |      |       |      |      |

**Table S9.** B3LYP/TZVP g-tensors, hfcc (mT) and Mulliken spin densities computed for the QM/MM optimized geometry of a neutral tryptophan radical not H-bonded (**VP\_10ns-neu-B**), obtained after breaking the N1-H1 hydrogen bond with E243 and allowing E243 residue to form a hydrogen bond with a nearby water molecule after rotation around the C-O2 bond.

|                      |     | g-tensors | hfcc                    |                         |                  |                  |                  |                  |                  | spin densities |       |      |      |       |      |      |
|----------------------|-----|-----------|-------------------------|-------------------------|------------------|------------------|------------------|------------------|------------------|----------------|-------|------|------|-------|------|------|
|                      |     | $g_i$     | $A_i(\text{H-}\beta 1)$ | $A_i(\text{H-}\beta 2)$ | $A_i(\text{H1})$ | $A_i(\text{H2})$ | $A_i(\text{H5})$ | $A_i(\text{H7})$ | $A_i(\text{N1})$ | N1             | C2    | C3   | C5   | C6    | C7   | C8   |
| <b>VP_10ns-neu-B</b> | iso | 2.00296   | 2.85                    | 1.02                    | 0.00             | -0.03            | -0.47            | -0.38            | 0.28             | 0.25           | -0.08 | 0.61 | 0.24 | -0.08 | 0.17 | 0.01 |
|                      | x   | 2.00376   | 2.71                    | 0.95                    | -0.02            | -0.09            | -0.67            | -0.12            | -0.11            |                |       |      |      |       |      |      |
|                      | y   | 2.00284   | 3.05                    | 0.91                    | 0.04             | 0.16             | -0.21            | -0.61            | -0.12            |                |       |      |      |       |      |      |
|                      | z   | 2.00227   | 2.78                    | 1.21                    | -0.01            | -0.15            | -0.52            | -0.41            | 1.06             |                |       |      |      |       |      |      |

**Table S10.** g-tensors, hfcc (mT) and Mulliken spin densities computed for **W164Y\_10ns-B** structure.

|                            |            | B3LYP/EPR-II | PBE0/EPR-II | PBE0/TZVP | TPSSH/EPR-II | TPSSH/TZVP |
|----------------------------|------------|--------------|-------------|-----------|--------------|------------|
| <b>g-tensors</b>           |            |              |             |           |              |            |
| <b>g<sub>i</sub></b>       | <b>iso</b> | 2.0052       | 2.0053      | 2.0053    | 2.0048       | 2.0049     |
|                            | <b>x</b>   | 2.0087       | 2.0087      | 2.0090    | 2.0078       | 2.0079     |
|                            | <b>y</b>   | 2.0047       | 2.0048      | 2.0047    | 2.0045       | 2.0045     |
|                            | <b>z</b>   | 2.0023       | 2.0023      | 2.0023    | 2.0023       | 2.0023     |
| <b>hfcc</b>                |            |              |             |           |              |            |
| <b>A<sub>i</sub>(H-β1)</b> | <b>iso</b> | 2.50         | 2.43        | 2.29      | 2.58         | 2.45       |
|                            | <b>x</b>   | 2.63         | 2.57        | 2.43      | 2.72         | 2.59       |
|                            | <b>y</b>   | 2.39         | 2.32        | 2.17      | 2.49         | 2.34       |
|                            | <b>z</b>   | 2.46         | 2.40        | 2.26      | 2.55         | 2.41       |
| <b>A<sub>i</sub>(H-β2)</b> | <b>iso</b> | 0.64         | 0.63        | 0.60      | 0.66         | 0.63       |
|                            | <b>x</b>   | 0.58         | 0.57        | 0.54      | 0.60         | 0.57       |
|                            | <b>y</b>   | 0.78         | 0.77        | 0.75      | 0.80         | 0.77       |
|                            | <b>z</b>   | 0.56         | 0.55        | 0.53      | 0.57         | 0.55       |
| <b>A<sub>i</sub>(H2)</b>   | <b>iso</b> | 0.21         | 0.29        | 0.29      | 0.21         | 0.23       |
|                            | <b>x</b>   | 0.19         | 0.24        | 0.25      | 0.18         | 0.20       |
|                            | <b>y</b>   | 0.33         | 0.43        | 0.44      | 0.35         | 0.36       |
|                            | <b>z</b>   | 0.11         | 0.18        | 0.18      | 0.11         | 0.13       |
| <b>A<sub>i</sub>(H6)</b>   | <b>iso</b> | 0.21         | 0.29        | 0.29      | 0.22         | 0.23       |
|                            | <b>x</b>   | 0.20         | 0.25        | 0.26      | 0.19         | 0.21       |
|                            | <b>y</b>   | 0.34         | 0.44        | 0.45      | 0.35         | 0.37       |
|                            | <b>z</b>   | 0.11         | 0.18        | 0.18      | 0.12         | 0.12       |
| <b>A<sub>i</sub>(H3)</b>   | <b>iso</b> | -0.63        | -0.71       | -0.69     | -0.68        | -0.68      |
|                            | <b>x</b>   | -0.94        | -1.04       | -1.02     | -1.00        | -0.99      |
|                            | <b>y</b>   | -0.24        | -0.30       | -0.30     | -0.28        | -0.29      |
|                            | <b>z</b>   | -0.71        | -0.78       | -0.76     | -0.77        | -0.76      |
| <b>A<sub>i</sub>(H5)</b>   | <b>iso</b> | -0.65        | -0.73       | -0.71     | -0.71        | -0.72      |
|                            | <b>x</b>   | -0.96        | -1.06       | -1.04     | -1.04        | -1.03      |
|                            | <b>y</b>   | -0.25        | -0.31       | -0.31     | -0.30        | -0.32      |
|                            | <b>z</b>   | -0.74        | -0.81       | -0.79     | -0.80        | -0.80      |
| <b>spin densities</b>      |            |              |             |           |              |            |
| <b>C1</b>                  |            | 0.38         | 0.46        | 0.46      | 0.41         | 0.45       |
| <b>C2</b>                  |            | -0.12        | -0.15       | -0.18     | -0.14        | -0.17      |
| <b>C3</b>                  |            | 0.25         | 0.31        | 0.31      | 0.27         | 0.30       |
| <b>C4</b>                  |            | -0.01        | -0.03       | -0.05     | -0.01        | -0.03      |
| <b>C5</b>                  |            | 0.26         | 0.31        | 0.31      | 0.27         | 0.30       |
| <b>C6</b>                  |            | -0.12        | -0.15       | -0.18     | -0.14        | -0.17      |
| <b>O1</b>                  |            | 0.35         | 0.36        | 0.36      | 0.35         | 0.35       |

**Table S11.** g-tensors, hfcc (mT) and Mulliken spin densities computed for **W164Y\_9.8ns-B** structure.

|                            |            | B3LYP/EPR-II | PBE0/EPR-II | PBE0/TZVP | TPSSH/EPR-II | TPSSH/TZVP |
|----------------------------|------------|--------------|-------------|-----------|--------------|------------|
| <b>g-tensors</b>           |            |              |             |           |              |            |
| <b>g<sub>i</sub></b>       | <b>iso</b> | 2.0051       | 2.0051      | 2.0052    | 2.0047       | 2.0048     |
|                            | <b>x</b>   | 2.0083       | 2.0083      | 2.0086    | 2.0074       | 2.0076     |
|                            | <b>y</b>   | 2.0047       | 2.0048      | 2.0047    | 2.0045       | 2.0045     |
|                            | <b>z</b>   | 2.0023       | 2.0023      | 2.0023    | 2.0023       | 2.0023     |
| <b>hfcc</b>                |            |              |             |           |              |            |
| <b>A<sub>i</sub>(H-β1)</b> | <b>iso</b> | 2.46         | 2.40        | 2.26      | 2.55         | 2.41       |
|                            | <b>x</b>   | 2.60         | 2.54        | 2.40      | 2.68         | 2.55       |
|                            | <b>y</b>   | 2.35         | 2.29        | 2.14      | 2.45         | 2.31       |
|                            | <b>z</b>   | 2.43         | 2.37        | 2.23      | 2.52         | 2.38       |
| <b>A<sub>i</sub>(H-β2)</b> | <b>iso</b> | 0.67         | 0.66        | 0.63      | 0.69         | 0.66       |
|                            | <b>x</b>   | 0.61         | 0.60        | 0.57      | 0.63         | 0.60       |
|                            | <b>y</b>   | 0.82         | 0.80        | 0.78      | 0.83         | 0.80       |
|                            | <b>z</b>   | 0.59         | 0.58        | 0.55      | 0.60         | 0.58       |
| <b>A<sub>i</sub>(H2)</b>   | <b>iso</b> | 0.20         | 0.27        | 0.28      | 0.20         | 0.22       |
|                            | <b>x</b>   | 0.18         | 0.23        | 0.24      | 0.18         | 0.19       |
|                            | <b>y</b>   | 0.32         | 0.42        | 0.42      | 0.33         | 0.34       |
|                            | <b>z</b>   | 0.10         | 0.17        | 0.17      | 0.10         | 0.11       |
| <b>A<sub>i</sub>(H6)</b>   | <b>iso</b> | 0.22         | 0.30        | 0.30      | 0.22         | 0.24       |
|                            | <b>x</b>   | 0.20         | 0.25        | 0.26      | 0.19         | 0.21       |
|                            | <b>y</b>   | 0.35         | 0.45        | 0.46      | 0.36         | 0.38       |
|                            | <b>z</b>   | 0.12         | 0.19        | 0.19      | 0.12         | 0.13       |
| <b>A<sub>i</sub>(H3)</b>   | <b>iso</b> | -0.61        | -0.69       | -0.67     | -0.66        | -0.66      |
|                            | <b>x</b>   | -0.91        | -1.01       | -0.99     | -0.97        | -0.96      |
|                            | <b>y</b>   | -0.23        | -0.29       | -0.28     | -0.26        | -0.27      |
|                            | <b>z</b>   | -0.69        | -0.76       | -0.74     | -0.74        | -0.74      |
| <b>A<sub>i</sub>(H5)</b>   | <b>iso</b> | -0.66        | -0.74       | -0.72     | -0.72        | -0.72      |
|                            | <b>x</b>   | -0.97        | -1.07       | -1.05     | -1.05        | -1.04      |
|                            | <b>y</b>   | -0.25        | -0.32       | -0.31     | -0.30        | -0.32      |
|                            | <b>z</b>   | -0.74        | -0.82       | -0.80     | -0.81        | -0.81      |
| <b>spin densities</b>      |            |              |             |           |              |            |
| <b>C1</b>                  |            | 0.38         | 0.42        | 0.46      | 0.41         | 0.45       |
| <b>C2</b>                  |            | -0.11        | -0.14       | -0.18     | -0.13        | -0.16      |
| <b>C3</b>                  |            | 0.25         | 0.27        | 0.30      | 0.26         | 0.29       |
| <b>C4</b>                  |            | -0.01        | -0.02       | -0.05     | -0.01        | -0.03      |
| <b>C5</b>                  |            | 0.26         | 0.28        | 0.32      | 0.27         | 0.30       |
| <b>C6</b>                  |            | -0.12        | -0.16       | -0.19     | -0.14        | -0.18      |
| <b>O1</b>                  |            | 0.35         | 0.36        | 0.36      | 0.34         | 0.35       |

**Table S12.** g-tensors, hfcc (mT) and Mulliken spin densities computed for **W164Y\_9.6ns-B** structure.

|                            |            | B3LYP/EPR-II | PBE0/EPR-II | PBE0/TZVP | TPSSH/EPR-II | TPSSH/TZVP |
|----------------------------|------------|--------------|-------------|-----------|--------------|------------|
| <b>g-tensors</b>           |            |              |             |           |              |            |
| <b>g<sub>i</sub></b>       | <b>iso</b> | 2.0051       | 2.0051      | 2.0052    | 2.0048       | 2.0048     |
|                            | <b>x</b>   | 2.0085       | 2.0083      | 2.0086    | 2.0076       | 2.0078     |
|                            | <b>y</b>   | 2.0047       | 2.0046      | 2.0047    | 2.0045       | 2.0044     |
|                            | <b>z</b>   | 2.0023       | 2.0023      | 2.0023    | 2.0023       | 2.0023     |
| <b>hfcc</b>                |            |              |             |           |              |            |
| <b>A<sub>i</sub>(H-β1)</b> | <b>iso</b> | 2.44         | 2.49        | 2.34      | 2.53         | 2.39       |
|                            | <b>x</b>   | 2.58         | 2.63        | 2.49      | 2.66         | 2.53       |
|                            | <b>y</b>   | 2.33         | 2.38        | 2.23      | 2.43         | 2.29       |
|                            | <b>z</b>   | 2.41         | 2.47        | 2.32      | 2.49         | 2.36       |
| <b>A<sub>i</sub>(H-β2)</b> | <b>iso</b> | 0.65         | 0.60        | 0.57      | 0.66         | 0.64       |
|                            | <b>x</b>   | 0.59         | 0.53        | 0.50      | 0.60         | 0.57       |
|                            | <b>y</b>   | 0.79         | 0.74        | 0.71      | 0.80         | 0.78       |
|                            | <b>z</b>   | 0.57         | 0.52        | 0.49      | 0.58         | 0.56       |
| <b>A<sub>i</sub>(H2)</b>   | <b>iso</b> | 0.20         | 0.27        | 0.27      | 0.21         | 0.22       |
|                            | <b>x</b>   | 0.18         | 0.23        | 0.24      | 0.18         | 0.20       |
|                            | <b>y</b>   | 0.32         | 0.41        | 0.41      | 0.33         | 0.35       |
|                            | <b>z</b>   | 0.10         | 0.17        | 0.16      | 0.11         | 0.11       |
| <b>A<sub>i</sub>(H6)</b>   | <b>iso</b> | 0.22         | 0.29        | 0.29      | 0.22         | 0.24       |
|                            | <b>x</b>   | 0.20         | 0.25        | 0.25      | 0.19         | 0.21       |
|                            | <b>y</b>   | 0.35         | 0.44        | 0.44      | 0.36         | 0.37       |
|                            | <b>z</b>   | 0.12         | 0.17        | 0.17      | 0.12         | 0.13       |
| <b>A<sub>i</sub>(H3)</b>   | <b>iso</b> | -0.62        | -0.70       | -0.68     | -0.67        | -0.67      |
|                            | <b>x</b>   | -0.92        | -1.03       | -1.00     | -0.98        | -0.98      |
|                            | <b>y</b>   | -0.23        | -0.29       | -0.28     | -0.27        | -0.28      |
|                            | <b>z</b>   | -0.70        | -0.77       | -0.75     | -0.75        | -0.74      |
| <b>A<sub>i</sub>(H5)</b>   | <b>iso</b> | -0.66        | -0.71       | -0.69     | -0.72        | -0.73      |
|                            | <b>x</b>   | -0.98        | -1.04       | -1.01     | -1.06        | -1.05      |
|                            | <b>y</b>   | -0.25        | -0.31       | -0.30     | -0.30        | -0.32      |
|                            | <b>z</b>   | -0.74        | -0.79       | -0.77     | -0.81        | -0.81      |
| <b>spin densities</b>      |            |              |             |           |              |            |
| <b>C1</b>                  |            | 0.38         | 0.42        | 0.46      | 0.41         | 0.45       |
| <b>C2</b>                  |            | -0.11        | -0.15       | -0.18     | -0.13        | -0.17      |
| <b>C3</b>                  |            | 0.25         | 0.28        | 0.30      | 0.26         | 0.29       |
| <b>C4</b>                  |            | -0.01        | -0.02       | -0.05     | -0.01        | -0.03      |
| <b>C5</b>                  |            | 0.26         | 0.27        | 0.30      | 0.27         | 0.30       |
| <b>C6</b>                  |            | -0.12        | -0.16       | -0.19     | -0.14        | -0.18      |
| <b>O1</b>                  |            | 0.34         | 0.35        | 0.36      | 0.34         | 0.35       |



**Table S13.** g-tensors, hfcc (mT) and Mulliken spin densities computed for **W164Y\_9.4ns-B** structure.

|                            |            | B3LYP/EPR-II | PBE0/EPR-II | PBE0/TZVP | TPSSH/EPR-II | TPSSH/TZVP |
|----------------------------|------------|--------------|-------------|-----------|--------------|------------|
| <b>g-tensors</b>           |            |              |             |           |              |            |
| <b>g<sub>i</sub></b>       | <b>iso</b> | 2.0053       | 2.0053      | 2.0054    | 2.0049       | 2.0049     |
|                            | <b>x</b>   | 2.0088       | 2.0089      | 2.0091    | 2.0079       | 2.0080     |
|                            | <b>y</b>   | 2.0047       | 2.0048      | 2.0047    | 2.0045       | 2.0044     |
|                            | <b>z</b>   | 2.0023       | 2.0023      | 2.0023    | 2.0023       | 2.0023     |
| <b>hfcc</b>                |            |              |             |           |              |            |
| <b>A<sub>i</sub>(H-β1)</b> | <b>iso</b> | 2.46         | 2.40        | 2.26      | 2.55         | 2.42       |
|                            | <b>x</b>   | 2.60         | 2.53        | 2.40      | 2.68         | 2.55       |
|                            | <b>y</b>   | 2.35         | 2.29        | 2.14      | 2.45         | 2.31       |
|                            | <b>z</b>   | 2.43         | 2.37        | 2.23      | 2.52         | 2.38       |
| <b>A<sub>i</sub>(H-β2)</b> | <b>iso</b> | 0.65         | 0.64        | 0.61      | 0.67         | 0.64       |
|                            | <b>x</b>   | 0.59         | 0.58        | 0.55      | 0.61         | 0.58       |
|                            | <b>y</b>   | 0.80         | 0.78        | 0.76      | 0.81         | 0.78       |
|                            | <b>z</b>   | 0.57         | 0.56        | 0.54      | 0.58         | 0.56       |
| <b>A<sub>i</sub>(H2)</b>   | <b>iso</b> | 0.21         | 0.29        | 0.29      | 0.22         | 0.23       |
|                            | <b>x</b>   | 0.19         | 0.24        | 0.25      | 0.19         | 0.21       |
|                            | <b>y</b>   | 0.34         | 0.44        | 0.44      | 0.35         | 0.36       |
|                            | <b>z</b>   | 0.11         | 0.19        | 0.18      | 0.12         | 0.13       |
| <b>A<sub>i</sub>(H6)</b>   | <b>iso</b> | 0.22         | 0.30        | 0.30      | 0.22         | 0.24       |
|                            | <b>x</b>   | 0.20         | 0.25        | 0.26      | 0.19         | 0.21       |
|                            | <b>y</b>   | 0.35         | 0.45        | 0.45      | 0.36         | 0.37       |
|                            | <b>z</b>   | 0.11         | 0.19        | 0.18      | 0.12         | 0.13       |
| <b>A<sub>i</sub>(H3)</b>   | <b>iso</b> | -0.64        | -0.71       | -0.69     | -0.69        | -0.69      |
|                            | <b>x</b>   | -0.95        | -1.05       | -1.02     | -1.01        | -1.00      |
|                            | <b>y</b>   | -0.24        | -0.30       | -0.30     | -0.28        | -0.29      |
|                            | <b>z</b>   | -0.72        | -0.79       | -0.76     | -0.77        | -0.76      |
| <b>A<sub>i</sub>(H5)</b>   | <b>iso</b> | -0.65        | -0.73       | -0.71     | -0.72        | -0.72      |
|                            | <b>x</b>   | -0.96        | -1.06       | -1.04     | -1.04        | -1.03      |
|                            | <b>y</b>   | -0.26        | -0.32       | -0.31     | -0.30        | -0.32      |
|                            | <b>z</b>   | -0.74        | -0.81       | -0.78     | -0.80        | -0.80      |
| <b>spin densities</b>      |            |              |             |           |              |            |
| <b>C1</b>                  |            | 0.38         | 0.42        | 0.46      | 0.41         | 0.45       |
| <b>C2</b>                  |            | -0.12        | -0.15       | -0.18     | -0.14        | -0.17      |
| <b>C3</b>                  |            | 0.26         | 0.28        | 0.31      | 0.27         | 0.30       |
| <b>C4</b>                  |            | -0.01        | -0.03       | -0.06     | -0.02        | -0.04      |
| <b>C5</b>                  |            | 0.26         | 0.28        | 0.31      | 0.27         | 0.30       |
| <b>C6</b>                  |            | -0.12        | -0.16       | -0.19     | -0.14        | -0.17      |
| <b>O1</b>                  |            | 0.35         | 0.36        | 0.37      | 0.35         | 0.35       |

**Table S14.** g-tensors, hfcc (mT) and Mulliken spin densities computed for **W164Y\_9.2ns-B** structure.

|                            |            | B3LYP/EPR-II | PBE0/EPR-II | PBE0/TZVP | TPSSH/EPR-II | TPSSH/TZVP |
|----------------------------|------------|--------------|-------------|-----------|--------------|------------|
| <b>g-tensors</b>           |            |              |             |           |              |            |
| <b>g<sub>i</sub></b>       | <b>iso</b> | 2.0050       | 2.0051      | 2.0052    | 2.0047       | 2.0048     |
|                            | <b>x</b>   | 2.0083       | 2.0083      | 2.0086    | 2.0075       | 2.0076     |
|                            | <b>y</b>   | 2.0046       | 2.0046      | 2.0047    | 2.0044       | 2.0044     |
|                            | <b>z</b>   | 2.0023       | 2.0023      | 2.0023    | 2.0023       | 2.0023     |
| <b>hfcc</b>                |            |              |             |           |              |            |
| <b>A<sub>i</sub>(H-β1)</b> | <b>iso</b> | 2.56         | 2.49        | 2.34      | 2.64         | 2.51       |
|                            | <b>x</b>   | 2.70         | 2.63        | 2.49      | 2.78         | 2.65       |
|                            | <b>y</b>   | 2.45         | 2.38        | 2.23      | 2.54         | 2.40       |
|                            | <b>z</b>   | 2.53         | 2.47        | 2.32      | 2.61         | 2.47       |
| <b>A<sub>i</sub>(H-β2)</b> | <b>iso</b> | 0.61         | 0.60        | 0.57      | 0.62         | 0.59       |
|                            | <b>x</b>   | 0.55         | 0.53        | 0.50      | 0.56         | 0.53       |
|                            | <b>y</b>   | 0.75         | 0.74        | 0.71      | 0.76         | 0.74       |
|                            | <b>z</b>   | 0.53         | 0.52        | 0.49      | 0.53         | 0.51       |
| <b>A<sub>i</sub>(H2)</b>   | <b>iso</b> | 0.20         | 0.27        | 0.27      | 0.20         | 0.22       |
|                            | <b>x</b>   | 0.18         | 0.23        | 0.24      | 0.18         | 0.20       |
|                            | <b>y</b>   | 0.32         | 0.41        | 0.41      | 0.33         | 0.35       |
|                            | <b>z</b>   | 0.09         | 0.17        | 0.16      | 0.10         | 0.11       |
| <b>A<sub>i</sub>(H6)</b>   | <b>iso</b> | 0.21         | 0.29        | 0.29      | 0.21         | 0.23       |
|                            | <b>x</b>   | 0.19         | 0.25        | 0.25      | 0.19         | 0.21       |
|                            | <b>y</b>   | 0.34         | 0.44        | 0.44      | 0.35         | 0.37       |
|                            | <b>z</b>   | 0.10         | 0.17        | 0.17      | 0.11         | 0.12       |
| <b>A<sub>i</sub>(H3)</b>   | <b>iso</b> | -0.62        | -0.70       | -0.68     | -0.67        | -0.67      |
|                            | <b>x</b>   | -0.93        | -1.03       | -1.00     | -0.99        | -0.99      |
|                            | <b>y</b>   | -0.23        | -0.29       | -0.28     | -0.27        | -0.28      |
|                            | <b>z</b>   | -0.70        | -0.77       | -0.75     | -0.76        | -0.75      |
| <b>A<sub>i</sub>(H5)</b>   | <b>iso</b> | -0.63        | -0.71       | -0.69     | -0.70        | -0.70      |
|                            | <b>x</b>   | -0.94        | -1.04       | -1.01     | -1.01        | -1.01      |
|                            | <b>y</b>   | -0.24        | -0.31       | -0.30     | -0.29        | -0.31      |
|                            | <b>z</b>   | -0.72        | -0.79       | -0.91     | -0.79        | -0.78      |
| <b>spin densities</b>      |            |              |             |           |              |            |
| <b>C1</b>                  |            | 0.38         | 0.42        | 0.46      | 0.41         | 0.45       |
| <b>C2</b>                  |            | -0.11        | -0.15       | -0.18     | -0.13        | -0.17      |
| <b>C3</b>                  |            | 0.25         | 0.28        | 0.30      | 0.27         | 0.29       |
| <b>C4</b>                  |            | -0.01        | -0.02       | -0.04     | -0.01        | -0.03      |
| <b>C5</b>                  |            | 0.25         | 0.27        | 0.30      | 0.26         | 0.29       |
| <b>C6</b>                  |            | -0.12        | -0.15       | -0.19     | -0.14        | -0.17      |
| <b>O1</b>                  |            | 0.34         | 0.35        | 0.36      | 0.34         | 0.35       |

**Table S15.** g-tensors, hfcc (mT) and Mulliken spin densities computed for **W164Y\_10ns-A** structure.

|                            |            | B3LYP/EPR-II | PBE0/EPR-II | PBE0/TZVP | TPSSh/EPR-II | TPSSh/TZVP |
|----------------------------|------------|--------------|-------------|-----------|--------------|------------|
| <b>g-tensors</b>           |            |              |             |           |              |            |
| <b>g<sub>i</sub></b>       | <b>iso</b> | 2.0044       | 2.0044      | 2.0045    | 2.0042       | 2.0043     |
|                            | <b>x</b>   | 2.0064       | 2.0064      | 2.0067    | 2.0060       | 2.0062     |
|                            | <b>y</b>   | 2.0045       | 2.0045      | 2.0046    | 2.0045       | 2.0045     |
|                            | <b>z</b>   | 2.0023       | 2.0023      | 2.0023    | 2.0023       | 2.0023     |
| <b>hfcc</b>                |            |              |             |           |              |            |
| <b>A<sub>i</sub>(H-β1)</b> | <b>iso</b> | 2.73         | 2.65        | 2.50      | 2.78         | 2.64       |
|                            | <b>x</b>   | 2.87         | 2.80        | 2.65      | 2.92         | 2.79       |
|                            | <b>y</b>   | 2.61         | 2.54        | 2.37      | 2.68         | 2.53       |
|                            | <b>z</b>   | 2.69         | 2.62        | 2.46      | 2.75         | 2.60       |
| <b>A<sub>i</sub>(H-β2)</b> | <b>iso</b> | 0.63         | 0.62        | 0.59      | 0.62         | 0.60       |
|                            | <b>x</b>   | 0.57         | 0.55        | 0.52      | 0.56         | 0.54       |
|                            | <b>y</b>   | 0.77         | 0.76        | 0.74      | 0.77         | 0.75       |
|                            | <b>z</b>   | 0.54         | 0.53        | 0.51      | 0.54         | 0.52       |
| <b>A<sub>i</sub>(H2)</b>   | <b>iso</b> | 0.16         | 0.23        | 0.23      | 0.16         | 0.18       |
|                            | <b>x</b>   | 0.14         | 0.20        | 0.20      | 0.14         | 0.15       |
|                            | <b>y</b>   | 0.28         | 0.36        | 0.37      | 0.29         | 0.30       |
|                            | <b>z</b>   | 0.06         | 0.12        | 0.12      | 0.06         | 0.07       |
| <b>A<sub>i</sub>(H6)</b>   | <b>iso</b> | 0.17         | 0.24        | 0.25      | 0.17         | 0.19       |
|                            | <b>x</b>   | 0.16         | 0.21        | 0.22      | 0.15         | 0.17       |
|                            | <b>y</b>   | 0.29         | 0.38        | 0.39      | 0.30         | 0.32       |
|                            | <b>z</b>   | 0.07         | 0.14        | 0.14      | 0.07         | 0.08       |
| <b>A<sub>i</sub>(H3)</b>   | <b>iso</b> | -0.54        | -0.61       | -0.59     | -0.58        | -0.58      |
|                            | <b>x</b>   | -0.81        | -0.90       | -0.88     | -0.86        | -0.85      |
|                            | <b>y</b>   | -0.18        | -0.23       | -0.23     | -0.22        | -0.23      |
|                            | <b>z</b>   | -0.63        | -0.69       | -0.67     | -0.67        | -0.66      |
| <b>A<sub>i</sub>(H5)</b>   | <b>iso</b> | -0.61        | -0.69       | -0.67     | -0.68        | -0.68      |
|                            | <b>x</b>   | -0.92        | -1.01       | -0.99     | -1.00        | -0.99      |
|                            | <b>y</b>   | -0.22        | -0.28       | -0.27     | -0.27        | -0.29      |
|                            | <b>z</b>   | -0.70        | -0.77       | -0.75     | -0.77        | -0.77      |
| <b>spin densities</b>      |            |              |             |           |              |            |
| <b>C1</b>                  |            | 0.39         | 0.43        | 0.46      | 0.42         | 0.45       |
| <b>C2</b>                  |            | -0.09        | -0.13       | -0.15     | -0.11        | -0.14      |
| <b>C3</b>                  |            | 0.21         | 0.23        | 0.25      | 0.22         | 0.24       |
| <b>C4</b>                  |            | 0.04         | 0.03        | 0.02      | 0.04         | 0.03       |
| <b>C5</b>                  |            | 0.24         | 0.26        | 0.29      | 0.25         | 0.28       |
| <b>C6</b>                  |            | -0.10        | -0.14       | -0.17     | -0.12        | -0.16      |
| <b>O1</b>                  |            | 0.31         | 0.32        | 0.32      | 0.31         | 0.31       |

The B3LYP and PBE0 EPR parameters, computed for the same structures of tyrosyl radicals, resulted to vary more than in the case of tryptophan radicals (e.g., g-tensors range within 300 ppm). The TPSSh functional provided computed g<sub>x</sub> values about 1000 ppm lower than those computed using the other functionals. In any case, hfcc values computed for tyrosyl radicals vary within 0.3 mT.

**Table S16.** B3LYP/TZVP g-tensors, hfcc (mT) and Mulliken spin densities computed for a QM/MM optimized structure of tyrosyl radical (**W164Y\_10ns-B2**) obtained from the optimized **W164Y\_10ns-B** model, following a subsequent QM/MM optimization in which R257 side chain were included in the QM region (see also Table S18).

|     | g-tensors | hfcc                    |                         |                  |                  |                  |                  | spin densities |       |      |       |      |       |      |
|-----|-----------|-------------------------|-------------------------|------------------|------------------|------------------|------------------|----------------|-------|------|-------|------|-------|------|
|     | $g_i$     | $A_i(\text{H-}\beta_1)$ | $A_i(\text{H-}\beta_2)$ | $A_i(\text{H2})$ | $A_i(\text{H6})$ | $A_i(\text{H3})$ | $A_i(\text{H5})$ | C1             | C2    | C3   | C4    | C5   | C6    | O1   |
| iso | 2.0053    | 2.29                    | 0.62                    | 0.21             | 0.21             | -0.61            | -0.62            | 0.42           | -0.15 | 0.28 | -0.03 | 0.28 | -0.15 | 0.36 |
| x   | 2.0089    | 2.44                    | 0.55                    | 0.20             | 0.20             | -0.92            | -0.92            |                |       |      |       |      |       |      |
| y   | 2.0047    | 2.18                    | 0.76                    | 0.33             | 0.33             | -0.23            | -0.23            |                |       |      |       |      |       |      |
| z   | 2.0023    | 2.26                    | 0.54                    | 0.10             | 0.10             | -0.69            | -0.70            |                |       |      |       |      |       |      |

Computed EPR parameters for **W164Y\_10ns-B** and **W164Y\_10ns-B2** models are very similar (see Table 4 in the main paper). Accordingly, the comparison of geometrical parameters shown in the following Table S18 with data in Table 6 of the main paper for the **W164Y\_10ns-B** model indicates that the inclusion of R257 side chain in the QM region, which has a high computational cost, does not affect the QM/MM optimized geometry. In particular, the distance between the O1 tyrosyl oxygen and the hydrogen of the closest -NH<sub>2</sub> group of R257 is almost invariant between the two structures.

## 2.2 Optimized Structures

**Table S17.** Selected geometrical parameters<sup>a</sup> for B3LYP/CHARMM optimized geometries of VP neutral tryptophan radical.

| System        | $\phi$  | N1-H1 | N1-C2 | N1-C9 | C2-C3 | C3-C4 | C4-C5 | C4-C9 | C5-C6 | C6-C7 | C7-C8 | C8-C9 | H1-O2 | $\theta_1^b$ | $\theta_2^b$ | $\rho_{C3}^b$ |
|---------------|---------|-------|-------|-------|-------|-------|-------|-------|-------|-------|-------|-------|-------|--------------|--------------|---------------|
| VP 9.8ns-neu  | -22.960 | 1.531 | 1.322 | 1.420 | 1.456 | 1.427 | 1.406 | 1.422 | 1.398 | 1.397 | 1.414 | 1.382 | 1.071 | -7.1         | -52.9        | 0.53          |
| VP 9.6ns-neu  | -23.831 | 1.501 | 1.323 | 1.419 | 1.454 | 1.426 | 1.405 | 1.419 | 1.399 | 1.395 | 1.413 | 1.380 | 1.084 | -6.0         | -54.0        | 0.53          |
| VP 9.4ns-neu  | -23.035 | 1.547 | 1.322 | 1.420 | 1.455 | 1.429 | 1.407 | 1.423 | 1.400 | 1.397 | 1.415 | 1.382 | 1.066 | -7.3         | -52.7        | 0.53          |
| VP 9.2ns-neu  | -23.740 | 1.514 | 1.318 | 1.419 | 1.452 | 1.426 | 1.406 | 1.424 | 1.400 | 1.397 | 1.415 | 1.382 | 1.066 | -6.2         | -53.8        | 0.54          |
| VP 10ns-neu-B | -25.950 | 4.049 | 1.317 | 1.419 | 1.448 | 1.432 | 1.399 | 1.425 | 1.402 | 1.396 | 1.414 | 1.383 | 0.994 | -6.5         | -53.3        | 0.58          |

<sup>a</sup>Distances in Å; angles in degrees. <sup>b</sup>Dihedral angles  $\theta_1$  and  $\theta_2$  and spin density  $\rho_{C3}$  are obtained by solving the McConnell relationships, using the program developed by Svistunenko (freely available at the URL <http://privatewww.essex.ac.uk/~svist/>) and providing the B3LYP/TZVP computed  $A_{\text{iso}}(\text{H-}\beta_1)$  and  $A_{\text{iso}}(\text{H-}\beta_2)$  values ( $B''=5.0$  mT).

**Table S18.** Selected geometrical parameters<sup>a</sup> for the B3LYP/CHARMM optimized geometry of tyrosyl radical in **W164Y\_10ns-B2** model.

| System        | $\phi$  | O1-C4 | O1-H1 | H1-O2 | C1-C2 | C1-C6 | C2-C3 | C3-C4 | C4-C5 | C5-C6 | O1-H(NH) <sup>b</sup> | O1-H(OH) <sup>c</sup> | $\theta_1^d$ | $\theta_2^d$ | $\rho_{C1}^d$ |
|---------------|---------|-------|-------|-------|-------|-------|-------|-------|-------|-------|-----------------------|-----------------------|--------------|--------------|---------------|
| W164Y 10ns-B2 | -29.522 | 1.259 | 3.094 | 0.971 | 1.419 | 1.419 | 1.373 | 1.456 | 1.450 | 1.368 | 2.008                 | 4.542                 | -1.3         | -58.7        | 0.40          |

<sup>a</sup>Distances in Å; angles in degrees. <sup>b</sup>Distance between O1 tyrosyl oxygen and the hydrogen of the closest -NH<sub>2</sub> group of R257. <sup>c</sup>H-bond distance between tyrosine O1 and the nearest water molecule. <sup>d</sup>Dihedral angles  $\theta_1$  and  $\theta_2$  and spin density  $\rho_{C1}$  are obtained by solving the McConnell relationships, using the program developed by Svistunenko (freely available at the URL <http://privatewww.essex.ac.uk/~svist/>) and providing the B3LYP/TZVP computed  $A_{\text{iso}}(\text{H-}\beta_1)$  and  $A_{\text{iso}}(\text{H-}\beta_2)$  values ( $B''=5.8$  mT).

## 2.3 QM/MM Energies

**Table S19.** Absolute energies (Hartree) for DFT/CHARMM optimized structures of VP tryptophan radical (see Fig. 1).

| System      | B3LYP/6-31G**# | B3LYP/cc-pVTZ//B3LYP/6-31G**# | CASPT2/6-31G**//B3LYP/6-31G**# |
|-------------|----------------|-------------------------------|--------------------------------|
| VP_10ns-cat | -1051.30788    | -1051.64834                   | -1048.05816                    |
| VP_10ns-TS  | -1051.30425    | -1051.64282                   | -1048.05306                    |
| VP_10ns-neu | -1051.31282    | -1051.64958                   | -1048.06198                    |

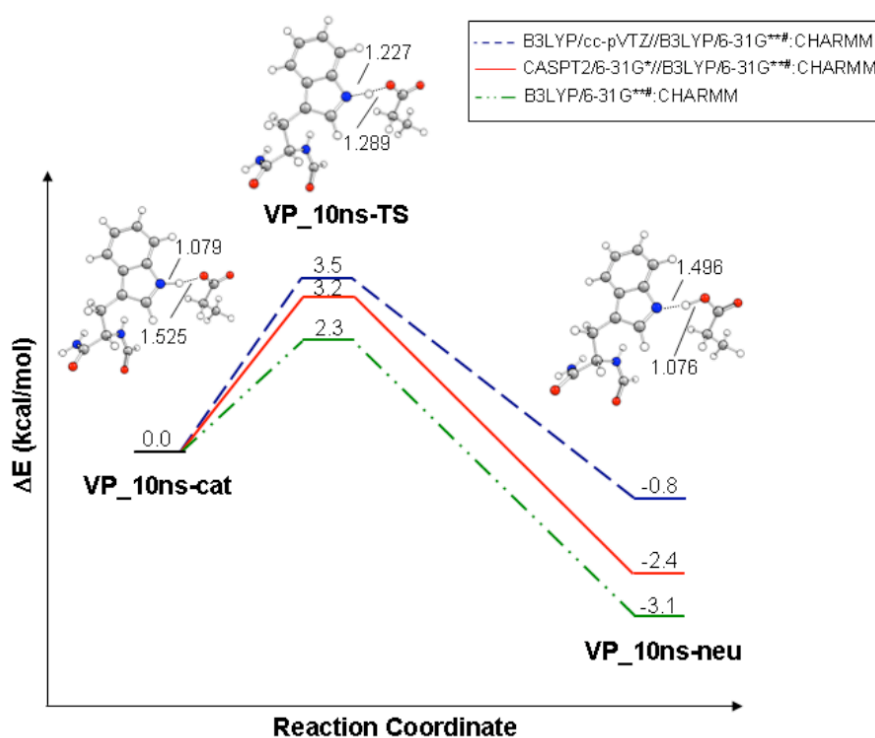

**Figure S1.** QM/MM energy profiles for the proton transfer in VP\_10ns model. The relative energies (kcal/mol) of tryptophan radical cation (VP\_10ns-cat), transition state (VP\_10ns-TS) and neutral tryptophan radical (VP\_10ns-neu) were computed at the B3LYP/6-31G\*\*#:CHARMM optimized structures using different levels of theory (see inset). The N1-H1 and H1-O2 bond lengths are given in Å.

### 3. References

- 1 H. Li, A. D. Robertson, J. H. Jensen, *Proteins* 2005, **61**, 704.
- 2 W. Humphrey, A. Dalke, K. Schulten, *J. Molec. Graphics* 1996, **14.1**, 33.
- 3 A. D. MacKerell Jr., D. Bashford, M. Bellott, R. L. Dunbrack Jr., J. D. Evanseck, M. J. Field, S. Fischer, J. Gao, H. Guo, S. Ha, D. Joseph-McCarthy, L. Kuchnir, K. Kuczera, F. T. K. Lau, C. Mattos, S. Michnick, T. Ngo, D. T. Nguyen, B. Prodhom, W. E. Reiher III, B. Roux, M. Schlenkrich, J. C. Smith, R. Stote, J. Straub, M. Watanabe, J. Wiórkiewicz-Kuczera, D. Yin, M. Karplus, *J. Phys. Chem. B* 1998, **102**, 3586.
- 4 K. Kuczera, J. Kuriyan, M. Karplus, *J. Mol. Biol.* 1990, **213**, 351.
- 5 G. Karlström, R. Lindh, P.-A. Malmqvist, B. O. Roos, U. Ryde, V. Veryazov, P.-O. Widmark, M. Cossi, B. Schimmelpfennig, P. Neogady, L. Seijo, *Comput. Mat. Sci.* 2003, **28**, 222.
- 6 J. W. Ponder 2004, Tinker4.2 - software tools for molecular design, Available at: <http://dasher.wustl.edu/tinker>
- 7 T. Andruniow, N. Ferré, M. Olivucci, *Proceed. Nat. Acad. Sci.* 2004, **101**, 17908–17913.
- 8 N. Ferré, M. Olivucci, *THEOCHEM* 2003, **632**, 71–82.
- 9 V. Barone, P. Cimino, *J. Chem. Theor. Comput.* 2009, **5**, 192.
- 10 D. A. Svistunenko, G. A. Jones, *Phys. Chem. Chem. Phys.* 2009, **11**, 6600.
- 11 B. Brogioni, D. Biglino, A. Sinicropi, E. Reiijerse, P. Giardina, G. Sannia, W. Lubitz, R. Basosi, P. R., *Phys. Chem. Chem. Phys.* 2008, **10**, 7284.
- 12 M. Pavone, P. Cimino, O. Crescenzi, A. Sillanpää, V. Barone, *J. Phys. Chem. B* 2007, **111**, 8928.
- 13 M. van Gastel, W. Lubitz, G. Lassmann, F. Neese, *J. Am. Chem. Soc.* 2004, **126**, 2237.
- 14 S. Sinnecker, M. Flores, W. Lubitz, *Phys. Chem. Chem. Phys.* 2006, **8**, 5659.
- 15 D. Baute, D. Arieli, F. Neese, H. Zimmermann, B. M. Weckhuysen, D. Goldfarb, *J. Am. Chem. Soc.* 2004, **126**, 11733.
- 16 S. Un, *Magn. Res. Chem.* 2005, **43**, S229.
- 17 F. Neese, *J. Biol. Inorg. Chem.* 2006, **11**, 702–711.
- 18 F. Neese, T. Petrenko, D. Ganyushin, G. Olbrich, *Coord. Chem. Rev.* 2007, **251**, 288.
- 19 A. D. Becke, *J. Chem. Phys.* 1993, **98**, 5648.
- 20 C. Lee, W. Yang, R. G. Parr, *Phys. Rev. B* 1988, **37**, 785–789.
- 21 P. J. Stephens, F. J. Devlin, C. F. Chabalowski, M. J. Frisch, *J. Phys. Chem.* 1994, **98**, 11623.
- 22 F. Neese, *EPR Newsletter* 2009, **18**, 4.
- 23 V. Barone, Recent Advances in Density Functional Methods (PartI), ed. D.P. Chong ed., World Scientific Publishing Co., 1995.
- 24 V. Barone, A. Polimeno, *Phys. Chem. Chem. Phys.* 2006, **8**, 4609–4629.
- 25 F. Neese, ORCA, an ab initio, Density Functional and Semi-empirical Program Package, University of Bonn, Germany, Version 2.7, June 2009
- 26 B. O. Roos, in *Adv. Chem. Phys. (Ab initio Methods in Quantum Chemistry-II)*, Vol. 69 (Ed.: K. P. Lawley), Wiley, New York, 1987, p. 399.
- 27 K. Andersson, P.-Å. Malmqvist, B. O. Roos, *J. Chem. Phys.* 1992, **96**, 1218–1226.
